# Supplementary material for: Association of Atherogenic Index of Plasma with Cardiometabolic Risk Factors and Markers in Lean 14-to-20-Year-Old Individuals: A Cross-Sectional Study
Source: MDPI journal article supplement (doi:10.3390/children10071144), 2023-06-30
Supplement: s1 [file s1]

# Association of Atherogenic Index of Plasma with Cardiometabolic Risk Factors and Markers in Lean 14-to-20-Year-Old Individuals: A Cross-Sectional Study

Katarína Šebeková <sup>1,\*</sup>, Radana Gurecká <sup>1,2</sup>, Melinda Csongová <sup>1</sup>, Ivana Koborová <sup>1</sup> and Peter Celec <sup>1,3</sup>

<sup>1</sup> Institute of Molecular BioMedicine, Faculty of Medicine, Comenius University, 81108 Bratislava, Slovakia

<sup>2</sup> Institute of Medical Physics, Biophysics, Informatics and Telemedicine, Faculty of Medicine, Comenius University, 81108 Bratislava, Slovakia

<sup>3</sup> Institute of Pathophysiology, Faculty of Medicine, Comenius University, 81108 Bratislava, Slovakia

\* Correspondence: katarina.sebekova@imbm.sk; Tel.: +421-2-9011-9-429

Among 1285 males, 109 (8.5%) presented with AIP $\geq$ 0.11. Of 109 males with increased atherogenic risk, 72 (66.1%) were overweight/obese. The prevalence of AIP $\geq$ 0.11 among 373 males with overweight/obesity reached 19.3%. Out of 1374 females, 48 (3.6%) displayed AIP $\geq$ 0.11. Among those with increased atherogenic risk, 20 were overweight/obese. The prevalence of AIP $\geq$ 0.11 among 274 overweight/obese females reached 7.3%.

**Supplementary Table S1:** Data according to the quartiles of atherogenic index of plasma (AIP) in males.

|                                  | Q1 (n=218)<br>-0.90 - $\leq$ -0.37 | Q2 (n=219)<br>>-0.37 - $\leq$ -0.25 | Q3 (n=219)<br>>-0.25 - $\leq$ -0.12 | Q4 (n=219)<br>>-0.12 - <0.11 | p                      |
|----------------------------------|------------------------------------|-------------------------------------|-------------------------------------|------------------------------|------------------------|
| AIP                              | -0.47 $\pm$ 0.08                   | -0.31 $\pm$ 0.04***                 | -0.19 $\pm$ 0.04***,+++             | -0.03 $\pm$ 0.06***,+++,###  | <b>&lt;0.001</b>       |
| Age, years                       | 17.0 $\pm$ 1.5                     | 17.1 $\pm$ 1.3                      | 17.4 $\pm$ 1.4                      | 17.3 $\pm$ 1.3               | 0.072                  |
| SBP, mm Hg                       | 120 $\pm$ 11                       | 120 $\pm$ 11                        | 120 $\pm$ 12                        | 121 $\pm$ 12                 | 0.893                  |
| DBP, mm Hg                       | 71 $\pm$ 7                         | 72 $\pm$ 7                          | 72 $\pm$ 7                          | 72 $\pm$ 8                   | 0.300                  |
| HR, b/min                        | 76 $\pm$ 12                        | 78 $\pm$ 11                         | 77 $\pm$ 15                         | 78 $\pm$ 13                  | 0.386                  |
| FPG, mmol/l                      | 4.9 $\pm$ 0.4                      | 4.9 $\pm$ 0.4                       | 4.9 $\pm$ 0.4                       | 4.9 $\pm$ 0.4                | 0.175                  |
| Uric acid, $\mu$ mol/l           | 340 $\pm$ 59                       | 343 $\pm$ 57                        | 344 $\pm$ 56                        | 349 $\pm$ 56                 | 0.464                  |
| eGFR, ml/s/1.73m <sup>2</sup>    | 112 $\pm$ 21                       | 112 $\pm$ 21                        | 111 $\pm$ 21                        | 108 $\pm$ 21                 | 0.153                  |
| Hcy, $\mu$ mol/l                 | 10.8 (7.2; 16.2)                   | 11.0 (7.8; 15.4)                    | 11.5 (8.0; 16.7)                    | 11.4 (7.9; 16.5)             | 0.194                  |
| <b>Prevalence</b>                |                                    |                                     |                                     |                              | <b>p<sup>chi</sup></b> |
| SBP $\geq$ 130 mm Hg, n (%)      | 44 (20.2)                          | 33 (15.1)                           | 41 (18.7)                           | 45 (20.5)                    | 0.438                  |
| DBP $\geq$ 85 mm Hg, n (%)       | 6 (2.8)                            | 8 (3.7)                             | 11 (5.0)                            | 15 (6.8)                     | 0.188                  |
| Elevated SBP or DBP, n (%)       | 45 (20.6)                          | 36 (16.4)                           | 43 (19.6)                           | 53 (24.2)                    | 0.244                  |
| Glucose $\geq$ 5.6 mmol/l, n (%) | 12 (5.5)                           | 18 (8.2)                            | 11 (5.0)                            | 15 (6.8)                     | 0.519                  |

Q quartile; SBP systolic blood pressure; DBP diastolic blood pressure; HR heart rate; FPG fasting plasma glucose; eGFR estimated glomerular filtration rate; Hcy homocysteine; Chi chi-square; data are given as mean  $\pm$  SD (normally distributed data) or as back-transformed log geometric mean (-1SD; +1SD) for data not fitting to normal distribution; data were compared using the ANOVA test with post-hoc Bonferroni correction.

**Supplementary Table S2:** Data according to the quartiles of atherogenic index of plasma (AIP) in females.

|                                 | Q1 (n=268)<br>-1.02 - ≤-0.42 | Q2 (n=268)<br>>-0.42 - ≤-0.29 | Q3 (n=268)<br>>-0.29 - ≤-0.17 | Q4 (n=268)<br>>-0.17 - <0.11 | p                      |
|---------------------------------|------------------------------|-------------------------------|-------------------------------|------------------------------|------------------------|
| AIP                             | -0.53±0.09                   | -0.38±0.04***                 | -0.23±0.03***,+++             | -0.07±0.07***,+++,###        | <0.001                 |
| Age, years                      | 17.1±1.4                     | 17.2±1.4                      | 17.2±1.4                      | 17.4±1.3                     | 0.226                  |
| SBP, mm Hg                      | 106±9                        | 106±9                         | 106±9                         | 107±9                        | 0.424                  |
| DBP, mm Hg                      | 69±8                         | 69±7                          | 70±7                          | 70±8                         | 0.433                  |
| HR, b/min                       | 81±13                        | 81±13                         | 80±13                         | 82±11                        | 0.516                  |
| FPG, mmol/l                     | 4.7±0.04                     | 4.7±0.04                      | 4.6±0.04                      | 4.7±0.04                     | 0.434                  |
| Uric acid, µmol/l               | 251±50                       | 253±49                        | 255±49                        | 252±48                       | 0.852                  |
| eGFR, ml/min/1.73m <sup>2</sup> | 108±16                       | 108±16                        | 106±16                        | 107±16                       | 0.515                  |
| Hcy, µmol/l                     | 9.1 (6.9; 12.0)              | 9.4 (7.0; 12.7)               | 9.5 (6.8; 13.3)               | 9.6 (7.2; 12.8)              | 0.189                  |
| <b>Prevalence</b>               |                              |                               |                               |                              | <b>p<sub>chi</sub></b> |
| SBP≥130 mm Hg, n (%)            | 6 (2.2)                      | 2 (0.7)                       | 2 (0.7)                       | 2 (0.7)                      | 0.257                  |
| DBP≥85 mm Hg, n (%)             | 11 (4.1)                     | 7 (2.6)                       | 8 (3.0)                       | 8 (3.0)                      | 0.779                  |
| Elevated SBP or DBP, n (%)      | 14 (5.2)                     | 9 (3.4)                       | 9 (3.4)                       | 9 (3.4)                      | 0.593                  |
| Glucose≥5.6 mmol/l, n (%)       | 4 (1.5)                      | 6 (2.2)                       | 3 (1.1)                       | 4 (1.5)                      | 0.768                  |

Q quartile; SBP systolic blood pressure; DBP diastolic blood pressure; HR heart rate; FPG fasting plasma glucose; eGFR estimated glomerular filtration rate; Hcy homocysteine; Chi chi-square; data are given as mean ± SD (normally distributed data) or as back-transformed log geometric mean (-1SD; +1SD) for data not fitting to normal distribution; data were compared using the ANOVA test with post-hoc Bonferroni correction.

**Supplementary Table S3:** Correlations between cardiometabolic factors and markers and atherogenic index of plasma (AIP) in lean males and females.

|            | All              |       |                     |       |             | Low risk         |       |                     |       |             |
|------------|------------------|-------|---------------------|-------|-------------|------------------|-------|---------------------|-------|-------------|
|            | Males<br>(n=912) |       | Females<br>(n=1100) |       | P<br>r to z | Males<br>(n=875) |       | Females<br>(n=1072) |       | P<br>r to z |
|            | r                | p     | r                   | p     |             | r                | p     | r                   | p     |             |
| SBP        | 0.026            | 0.435 | 0.033               | 0.277 | 0.873       | 0.025            | 0.456 | 0.032               | 0.292 | 0.881       |
| Heart rate | 0.022            | 0.508 | 0.056               | 0.065 | 0.447       | 0.048            | 0.156 | 0.056               | 0.066 | 0.857       |
| FPG        | 0.043            | 0.193 | -0.029              | 0.340 | 0.757       | 0.049            | 0.150 | -0.033              | 0.287 | 0.072       |
| Uric acid  | 0.056            | 0.093 | 0.004               | 0.889 | 0.246       | 0.053            | 0.118 | 0.008               | 0.788 | 0.322       |

SBP systolic blood pressure; FPG fasting plasma glucose; r Pearson correlation coefficients; Fisher's r to z transformation was used to assess the significance of the difference between two correlation coefficients in two independent samples (males vs. females).
